# Supplementary material
Source: publisher figshare collection journal article supplement (https://sage.figshare.com/articles/dataset/_/7819826)
Supplement: Supplementary file 1 [file 14549477]

**Supplemental Figure 1.** Patient and Family Survey. © 2014 Mayo Foundation for Medical Education and Research; used with permission.

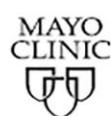

## Music Therapy Survey

**Instructions:** Please take a few minutes to complete and return this evaluation survey

|                                                                                              |                                             |                                                |                                               |
|----------------------------------------------------------------------------------------------|---------------------------------------------|------------------------------------------------|-----------------------------------------------|
| <b>How satisfied were you with the music therapy that you received today at Mayo Clinic?</b> |                                             |                                                |                                               |
| <input type="checkbox"/> Very Satisfied                                                      | <input type="checkbox"/> Somewhat Satisfied | <input type="checkbox"/> Somewhat Dissatisfied | <input type="checkbox"/> Very Dissatisfied    |
| <b>How effective was the music therapy in providing the following:</b>                       |                                             |                                                |                                               |
| <b>Stress Relief</b>                                                                         |                                             |                                                |                                               |
| <input type="checkbox"/> Very Effective                                                      | <input type="checkbox"/> Somewhat Effective | <input type="checkbox"/> Not Very Effective    | <input type="checkbox"/> Not at all Effective |
| <b>Relaxation</b>                                                                            |                                             |                                                |                                               |
| <input type="checkbox"/> Very Effective                                                      | <input type="checkbox"/> Somewhat Effective | <input type="checkbox"/> Not Very Effective    | <input type="checkbox"/> Not at all Effective |
| <b>Pain Relief</b>                                                                           |                                             |                                                |                                               |
| <input type="checkbox"/> Very Effective                                                      | <input type="checkbox"/> Somewhat Effective | <input type="checkbox"/> Not Very Effective    | <input type="checkbox"/> Not at all Effective |
| <b>Spiritual Support</b>                                                                     |                                             |                                                |                                               |
| <input type="checkbox"/> Very Effective                                                      | <input type="checkbox"/> Somewhat Effective | <input type="checkbox"/> Not Very Effective    | <input type="checkbox"/> Not at all Effective |
| <b>Emotional Support</b>                                                                     |                                             |                                                |                                               |
| <input type="checkbox"/> Very Effective                                                      | <input type="checkbox"/> Somewhat Effective | <input type="checkbox"/> Not Very Effective    | <input type="checkbox"/> Not at all Effective |
| <b>General feeling of wellness</b>                                                           |                                             |                                                |                                               |
| <input type="checkbox"/> Very Effective                                                      | <input type="checkbox"/> Somewhat Effective | <input type="checkbox"/> Not Very Effective    | <input type="checkbox"/> Not at all Effective |
| <b>Would you recommend this to others?</b>                                                   |                                             |                                                |                                               |
| <input type="checkbox"/> Yes                                                                 | <input type="checkbox"/> No                 |                                                |                                               |
| <b>Comments</b>                                                                              |                                             |                                                |                                               |
|                                                                                              |                                             |                                                |                                               |

**Supplemental Figure 2.** Palliative Medicine Provider Survey.

Music Therapy Palliative Care Service Pilot Survey

1. Were you aware of the Music Therapy Pilot taking place in collaboration with Palliative Care?
  - a. Yes
  - b. No
2. Prior to the June 2016 Music Therapy Pilot, had you worked with a board-certified music therapist (MT-BC)?
  - a. Yes
  - b. No
3. Prior to the Music Therapy Pilot, what was your knowledge/understanding of Music Therapy?
  - a. I had no knowledge/understanding
  - b. I had some knowledge/understanding
  - c. I had lots of knowledge/understanding
4. Did you refer any of your patients to Music Therapy during the pilot?
  - a. Yes
  - b. No
  - c. Wasn't on service
5. When considering a Music Therapy Consultation for your patient(s), which of the following served as triggers? Select all that apply.
  - a. Pain
  - b. Anxiety
  - c. Dyspnea
  - d. Psychosocial support
  - e. Grief
  - f. Delirium/Agitation
  - g. Legacy building
  - h. All of the above
  - i. None of the above
6. What percentage of your patients do you believe could benefit from Music Therapy interventions?
  - a. 0-25%
  - b. 25-50%
  - c. 50-75%
  - d. 75-100%
7. In your opinion, what patient population has the greater Music Therapy need?
  - a. Rochester Methodist Hospital patients

b. St Marys Hospital patients

8. Please summarize the outcomes/benefits you felt your patient(s) experienced as a result of a Music Therapy intervention. [Free-text response]
9. Did anything surprise you about your patients' Music Therapy sessions? Please provide any other information or thoughts/experiences you'd like to share. [Free-text response]
10. As a provider, do you feel you've benefited from having Music Therapy available for your patients? If so, how? [Free-text response]

**Supplemental Figure 3.** Free-Text Comments From Patient Surveys.

- 
- Music therapy was extremely relaxing and allowed me to rest.
  - The music therapist was a great calming influence.
  - I wasn't aware of music therapy, but my husband, who I never thought would enjoy this, did.
  - Please continue this service to help other families like ours to feel peace in a different setting.
-
